# Supplementary material for: Extracellular vesicle-based vaccine platform displaying native viral envelope proteins elicits a robust anti-SARS-CoV-2 response in mice
Source: bioRxiv or medRxiv preprint supplement (doi:10.1101/2020.10.28.357137), 2020-10-28
Supplement: Supplementary file [file media-1.pdf]

## Supplementary Materials for

### Extracellular vesicle-based vaccine platform displaying native viral envelope proteins elicits a robust anti-SARS-CoV-2 response in mice

K. Polak<sup>1\*</sup>, N. Greze<sup>1</sup>, M. Lachat<sup>1</sup>, D. Merle<sup>1</sup>, S. Chiumento<sup>1</sup>, C. Bertrand-Gaday<sup>2</sup>, B. Trentin<sup>1</sup>, R. Z. Mamoun<sup>1\*</sup>.

Correspondence to: rzmamoun@ciloa.fr; kpolak@ciloa.fr

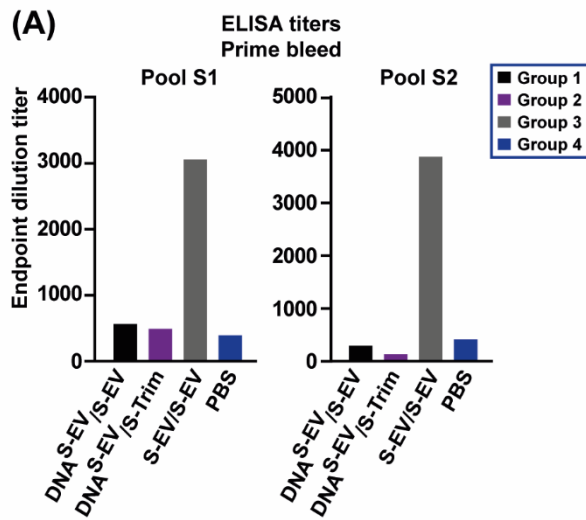

**Fig. S1. Humoral response in mice immunized with CoVEVax.**

(A) Specific IgG response to SARS-CoV-2 S1 and S2 peptide pools at day 42 measured by ELISA. Results are presented as reciprocal endpoint dilution titers from pooled sera; n=6 mice per group.
